# Supplementary material for: Gestational Age and Cardiorespiratory Fitness in Individuals Born At Term: A Life Course Study
Source: PubMed Central journal article supplement — J Am Heart Assoc. 2017 Sep 27;6(10):e006467. doi: 10.1161/JAHA.117.006467 (PMC5721855; doi:10.1161/jaha.117.006467), 2017-09-27

# **SUPPLEMENTAL MATERIAL**

**Table S1.** Analyses of predictors of attrition in young adulthood among the 791 participants selected from the NIYHP for the present study.

| Baseline characteristics*                    | Included at YH3<br>(n=356)         | Drop out at<br>YH3<br>(n=435)      | Drop-outs vs. Included |                   |                  |
|----------------------------------------------|------------------------------------|------------------------------------|------------------------|-------------------|------------------|
|                                              | Mean (SD),<br>median [IQR]<br>or % | Mean (SD),<br>median [IQR]<br>or % | OR***                  | 95% CI            | P-value          |
| <b>Perinatal variables</b>                   |                                    |                                    |                        |                   |                  |
| Gestational age, weeks                       | 39.7 (1.01)                        | 39.7 (1.08)                        | n/i                    | -                 | -                |
| Early term (37-38 weeks), %                  | 12.9                               | 14.7                               | 1.00                   | -                 | -                |
| Full term (39-40 weeks), %                   | 68.5                               | 66.4                               | 0.94                   | 0.61; 1.47        | 0.796            |
| Late term (41-42 weeks), %                   | 18.6                               | 18.9                               | 0.90                   | 0.52; 1.55        | 0.706            |
| Sex, % female                                | 50.0                               | 50.0                               | 0.92                   | 0.61; 1.40        | 0.707            |
| Socio-economic status, % manual              | 19.4                               | 33.8                               | <b>1.95</b>            | <b>1.37; 2.77</b> | <b>&lt;0.001</b> |
| Birthweight, z-score                         | 0.06 (1.00)                        | -0.03 (1.04)                       | 0.98                   | 0.83; 1.16        | 0.836            |
| Mode of delivery                             |                                    |                                    |                        |                   |                  |
| Vaginal (normal), %                          | 83.4                               | 79.5                               | 1.00                   | -                 | -                |
| Vaginal (assisted instrumental), %           | 11.5                               | 16.3                               | <b>1.59</b>            | <b>1.02; 2.49</b> | <b>0.039</b>     |
| Caesarean, %                                 | 5.1                                | 4.2                                | 0.87                   | 0.43; 1.78        | 0.708            |
| Breast feeding                               |                                    |                                    |                        |                   |                  |
| Never, %                                     | 77.8                               | 86.2                               | 1.00                   | -                 | -                |
| ≤3 months, %                                 | 14.6                               | 8.3                                | 0.63                   | 0.39; 1.01        | 0.055            |
| >3 months, %                                 | 7.6                                | 5.5                                | 0.83                   | 0.46; 1.53        | 0.558            |
| Maternal age, years                          | 28.2 (5.8)                         | 27.3 (5.3)                         | 0.98                   | 0.96; 1.01        | 0.127            |
| Maternal BMI, kg/m <sup>2</sup>              | 24.5 (4.0)                         | 24.5 (3.9)                         | 1.00                   | 0.96; 1.04        | 0.852            |
| Maternal smoking habits                      |                                    |                                    |                        |                   |                  |
| Non-smoker, %                                | 58.2                               | 69.9                               | 1.00                   | -                 | -                |
| Sporadic smoker, %                           | 4.6                                | 2.8                                | 1.87                   | 0.84; 4.22        | 0.127            |
| Regular smoker, %                            | 37.2                               | 27.3                               | 1.37                   | 0.98; 1.91        | 0.067            |
| <b>Time-dependent variables <sup>a</sup></b> |                                    |                                    |                        |                   |                  |
| VO <sub>2</sub> max, mL/min/kg               | 45.1 (6.0)                         | 44.0 (5.9)                         | 1.00                   | 0.97; 1.04        | 0.913            |
| Height, cm                                   | 158 (11)                           | 157 (11)                           | 0.99                   | 0.97; 1.02        | 0.577            |
| Sum of skinfolds, mm (x10)                   | 349 [276; 472]                     | 383 [290; 537]                     | <b>1.15</b>            | <b>1.04; 1.27</b> | <b>0.009</b>     |
| Maturity stage, ** %                         |                                    |                                    |                        |                   |                  |
| Pre-pubescent (stage I)                      | 26.1                               | 25.8                               | 1.00                   | -                 | -                |
| Pubescent (stages II-III)                    | 22.5                               | 20.1                               | 0.83                   | 0.52; 1.38        | 0.504            |
| Post-pubescent (stages IV-V)                 | 51.4                               | 54.1                               | 0.86                   | 0.45; 1.65        | 0.656            |
| <b>Cohort, % 15-year olds</b>                | 45.8                               | 50.1                               | 1.34                   | 0.80; 2.23        | 0.267            |

OR, odds ratio; CI, confidence interval; SD, standard deviation; n/i, not included.

\*for the time-dependent covariates, baseline characteristics are those obtained at the ages of 12 or 15 among the participants in the respective cohorts;

\*\*based on Tanner's stages for pubic hair development;

\*\*\*ORs are from a multivariable model including all the variables listed; analysis with gestational age in weeks instead of categories did not change the estimates.

**Figure S1.** Trajectories of CRF through adolescence to young adulthood in the whole study population and by sex; A,  $VO_2\text{max}$  in mL/min/kg; B,  $VO_2\text{max}$  in mL/min/FFM; C,  $VO_2\text{max}$  in mL/min/kg<sup>0.67</sup>; D,  $VO_2\text{max}$  in mL/min/kg<sup>0.79</sup>. Mean CRF levels at each age were estimated with GEE models. Error bars indicate 95% confidence intervals.

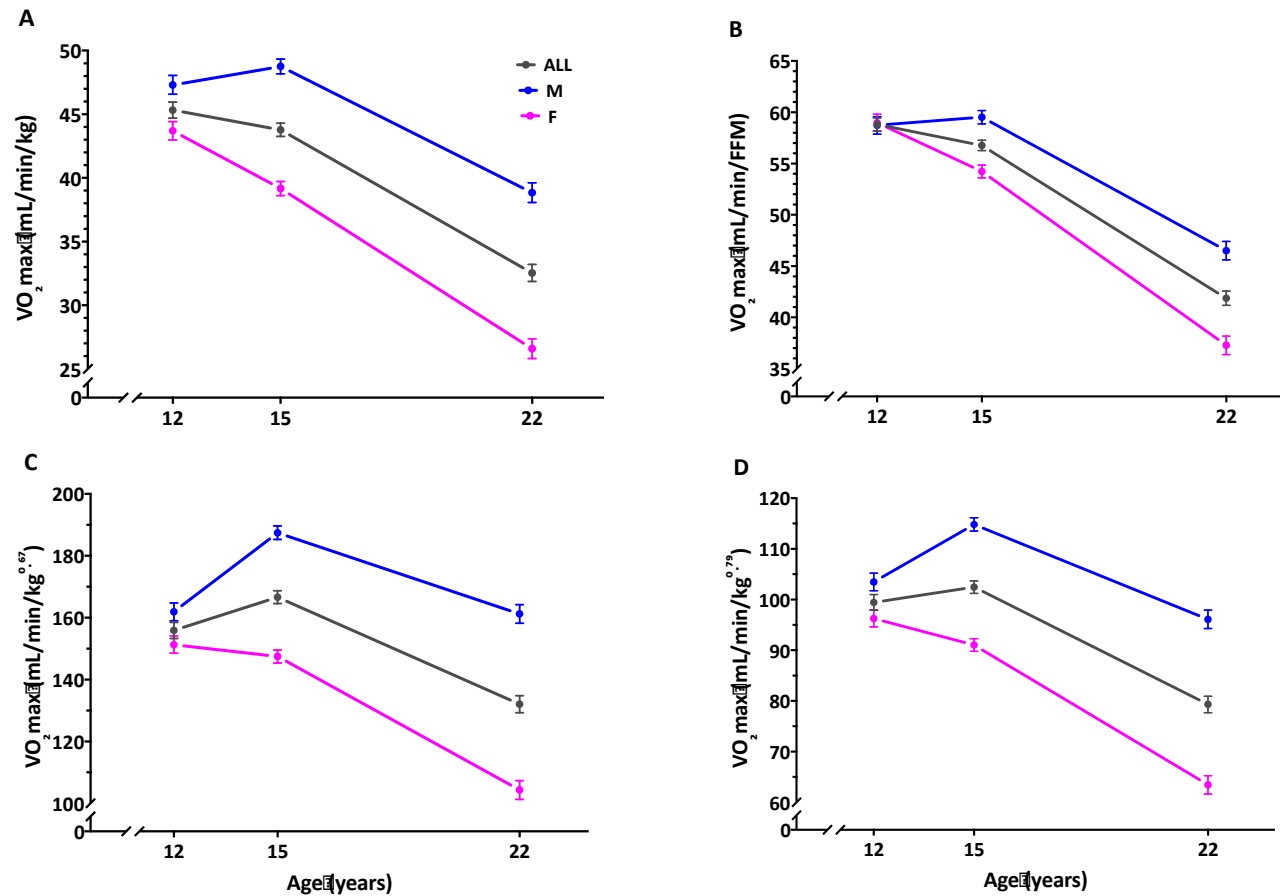

**Figure S2.** Trajectories of CRF through adolescence to young adulthood by categories of gestational age; A, VO<sub>2</sub>max expressed by VO<sub>2</sub>max in mL/min/FFM, B, VO<sub>2</sub>max in mL/min/kg<sup>0.67</sup>; C, VO<sub>2</sub>max in mL/min/kg<sup>0.79</sup>. Mean CRF levels or proportions with poor CRF at each age were estimated with GEE models adjusted for sex, age and sex interactions, cohort, birthweight z-scores, socio-economic status, delivery mode, breast feeding, and maternal age, BMI and smoking. Error bars indicate 95% confidence intervals.

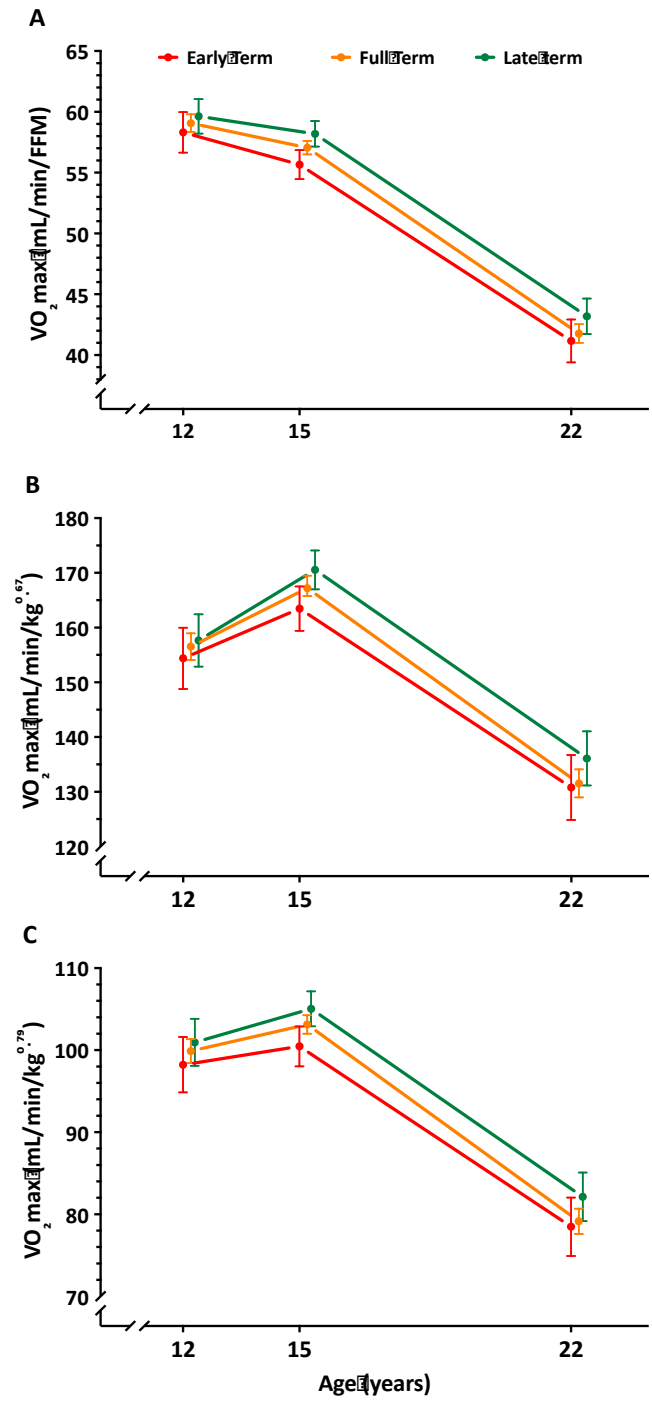

Supplement: JAH3-6-e006467-s001.pdf [file JAH3-6-e006467-s001.pdf]
